# Supplementary material
Source: Springer Nature journal article supplement (https://www.springermedizin.de/resource/supplementary/12936_2011_1999_MOESM2_ESM.pdf/9543138)

M 1 2 3 4 5 6 7 8 9

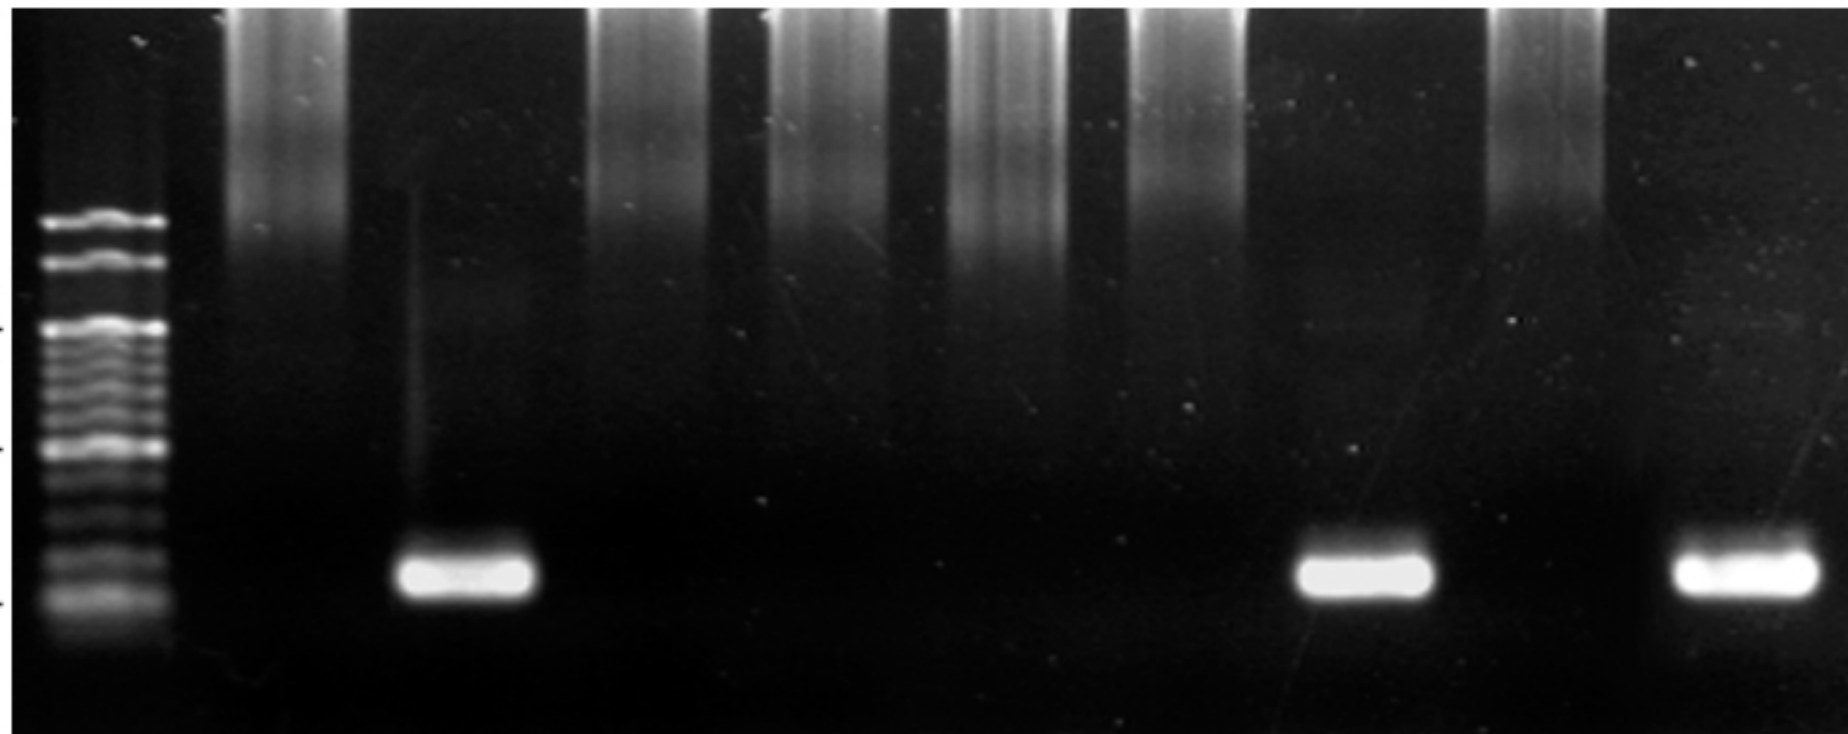

Supplement: MOESM2 [file 9543138]
